# Supplementary material for: Gene expression during bacterivorous growth of a widespread marine heterotrophic flagellate
Source: PubMed Central journal article supplement (PMC7852580; doi:10.1038/s41396-020-00770-4), 2020-09-12
Supplement: 41396_2020_770_MOESM1_ESM.pdf [file 41396_2020_770_MOESM1_ESM.pdf]

## Supplementary Information

**Fig. S1** Cleaning of sequencing reads before *de novo* transcriptome assembly. **a** Percentage of reads mapping the *Dokdonia* MED134 genome. **b** Percentage of reads mapping the operon of *C. burkhardae* (after excluding *Dokdonia* reads).

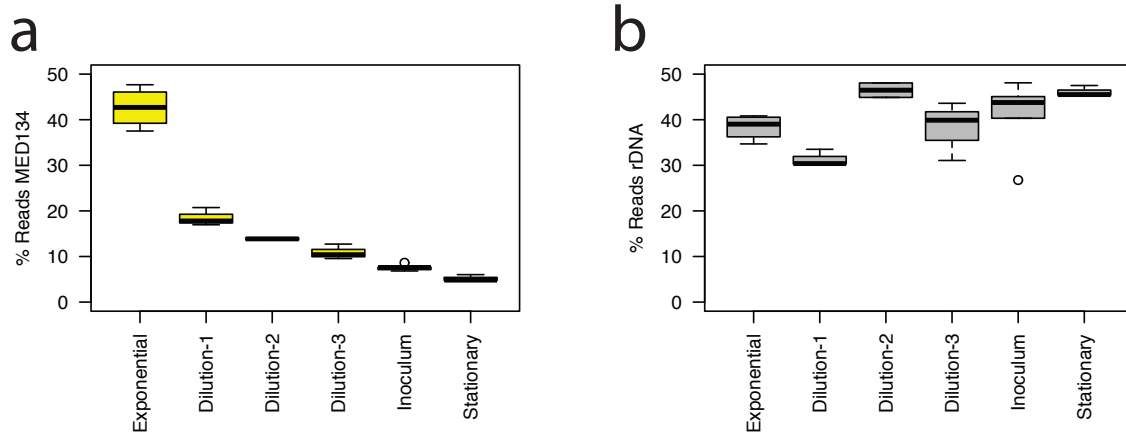

**Fig. S2** Expression level of selected transcripts before and after being split in 2-4 fragments based on the presence of ORFs with different functional predictions. The list shows highly expressed transcripts in the Exponential phase (average TPM >500 before splitting).

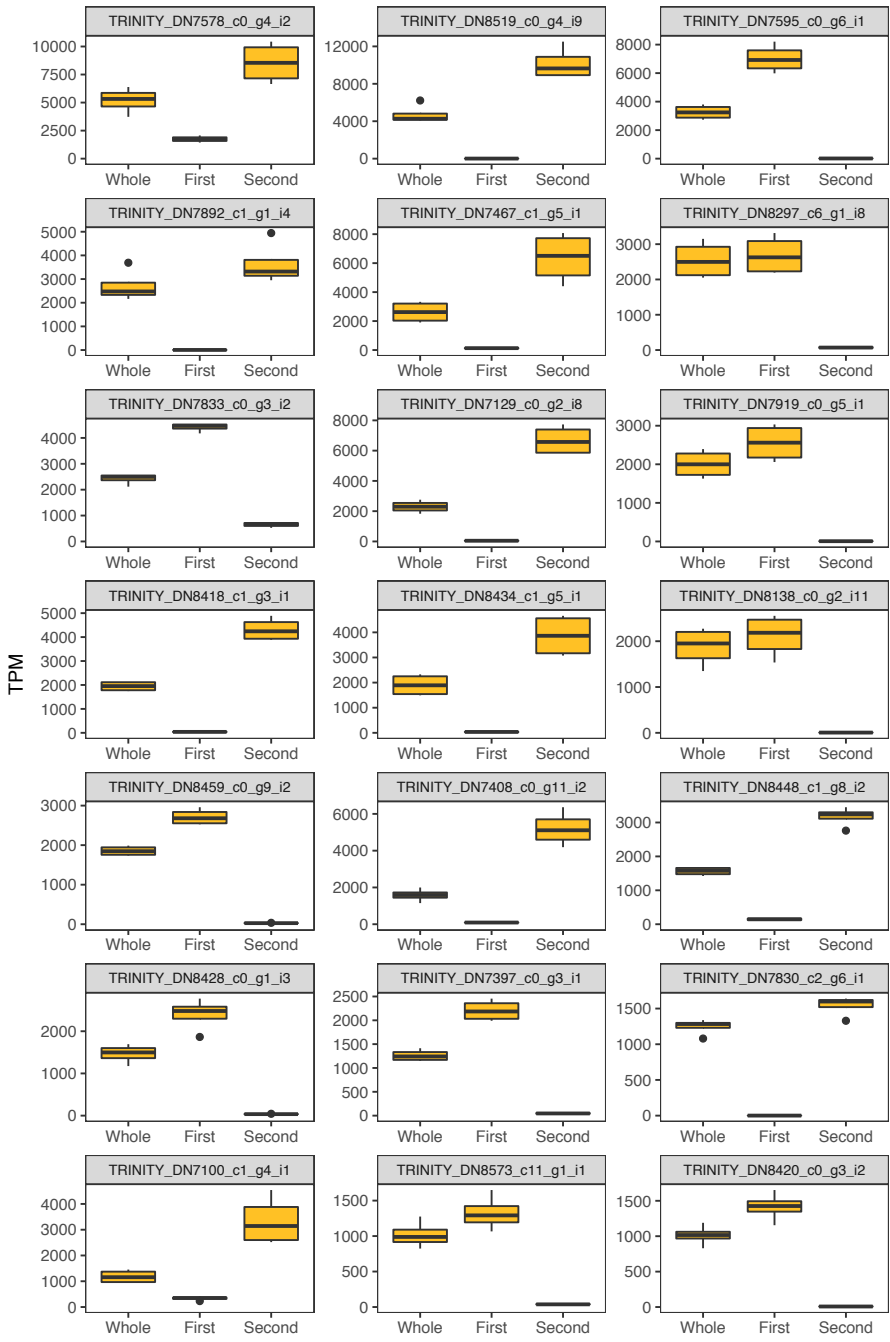

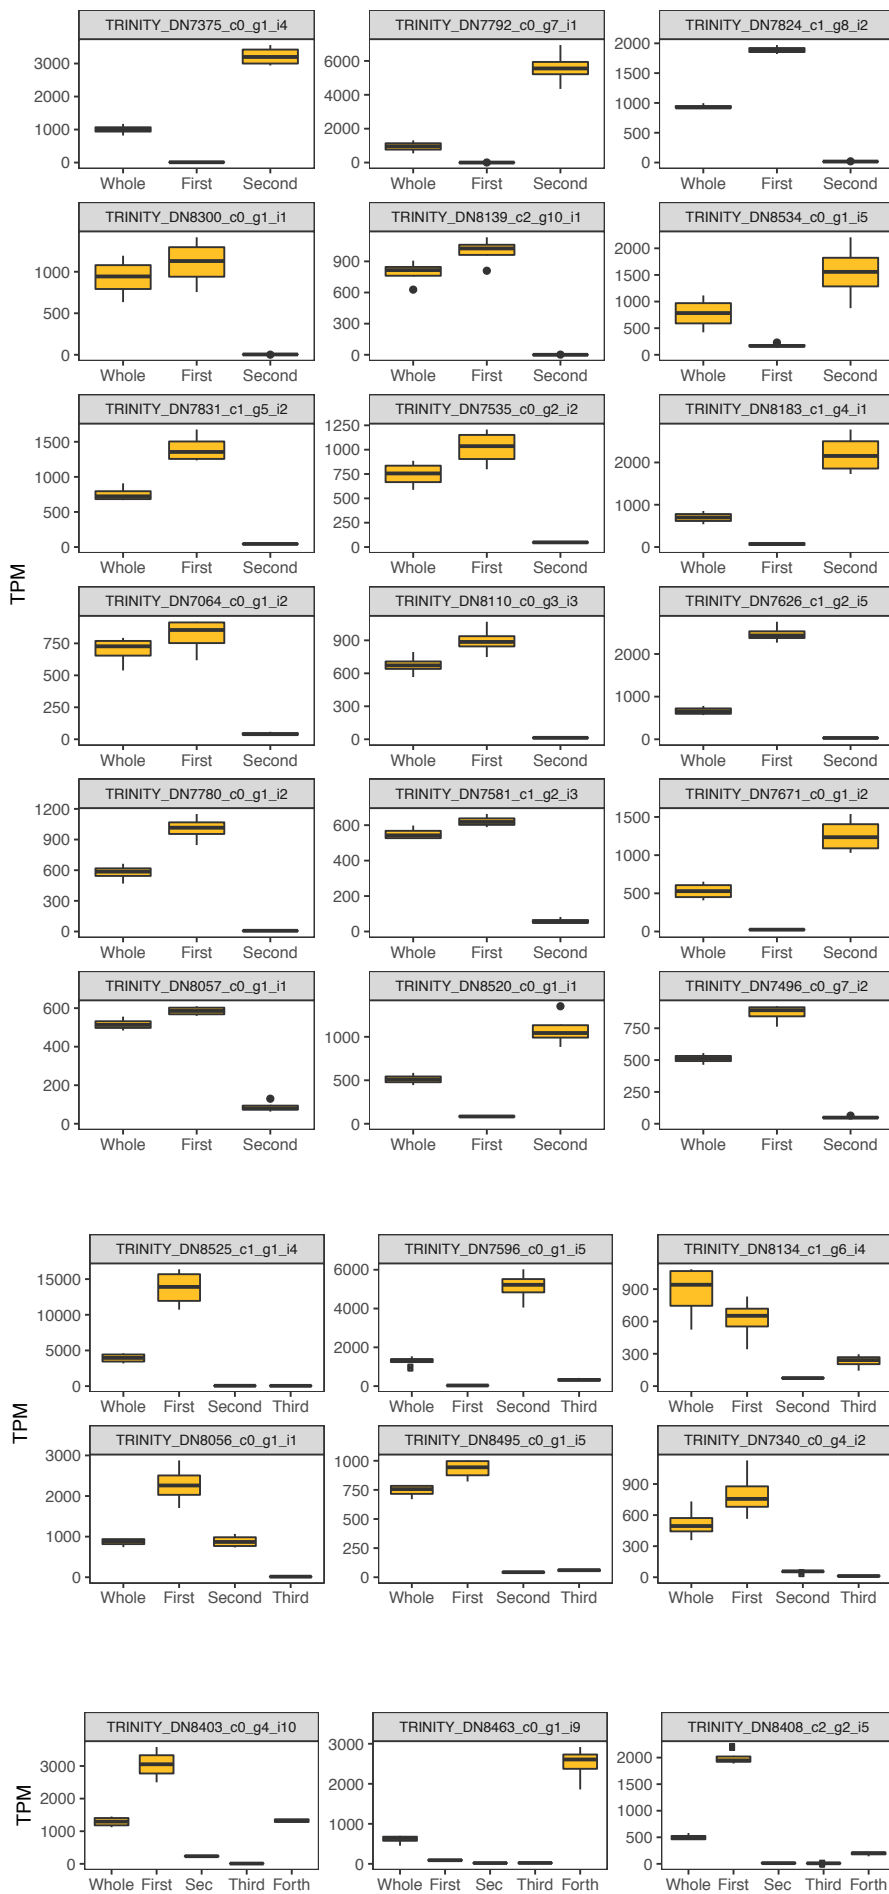

**Fig. S3** Fragment recruitment analysis done with metagenomes from the Malaspina expedition and the *C. burkhardae* genome as reference. Data is separated in the three water column regions, epipelagic (20 metagenomes), mesopelagic (26), and bathypelagic (20).

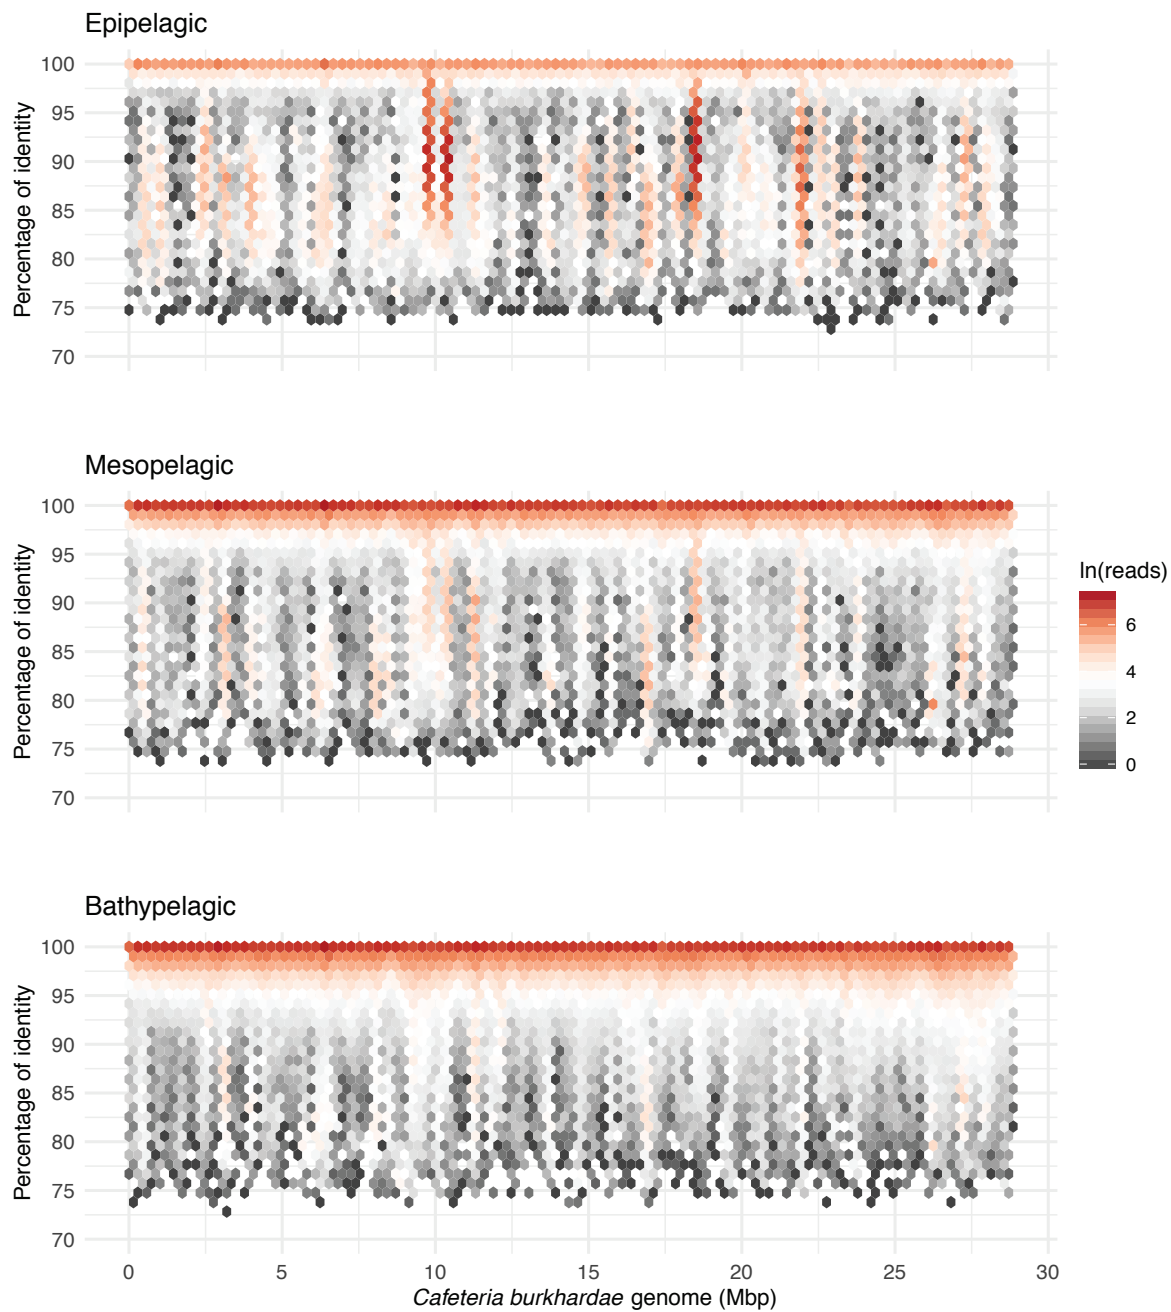

**Fig. S4** Comparison of the expression profiles of all samples in the five main states plus the Inoculum, and the MMETSP transcriptome. **a** NMDS plot placing samples in a two dimensional space based on TPM values of all genes. **b** Heatmap showing Pearson correlation coefficients in sample pairwise comparisons based on differently expressed genes.

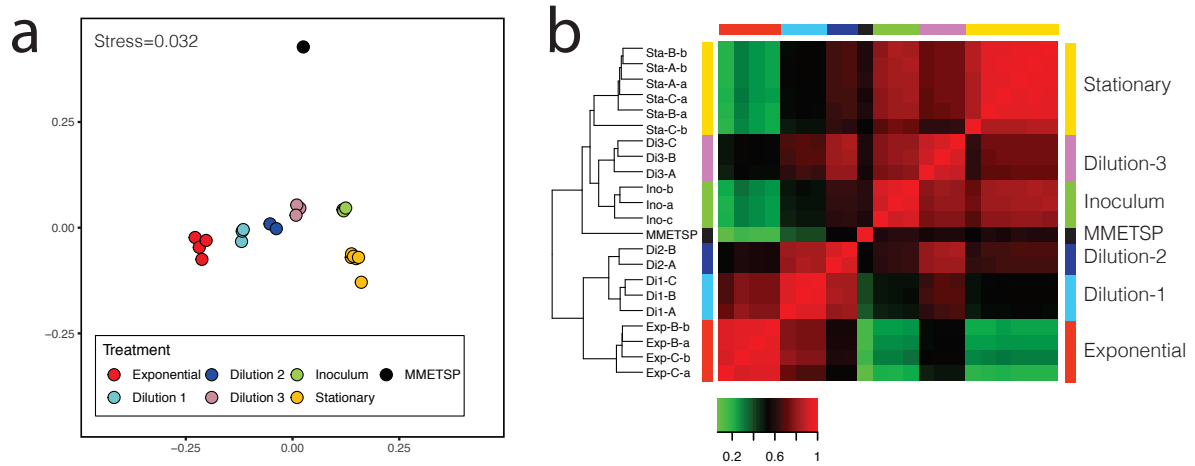

**Fig. S5** Box plots displaying expression changes in the five states of the 432 highly expressed genes, ordered based on their general process and cellular function and then by differential expression between Exponential and Stationary. Orange: genes upregulated in Exponential; Green; genes upregulated in Stationary; Grey: genes equally expressed.

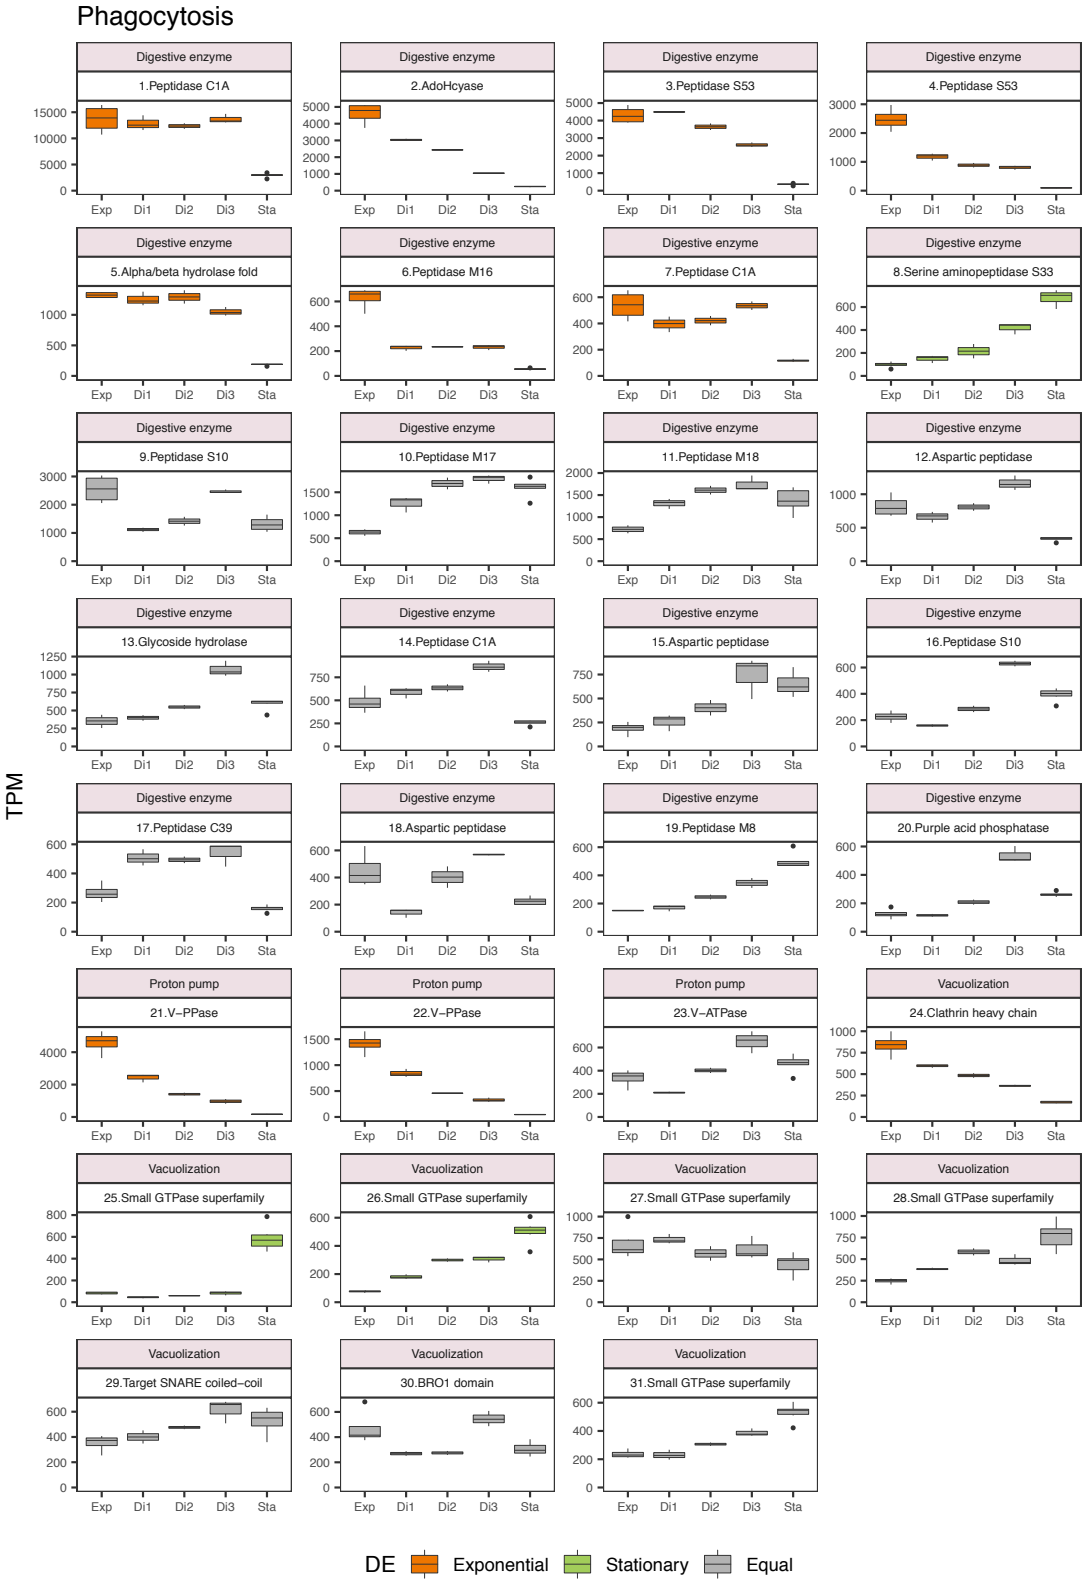

## Motility and Cytoskeleton

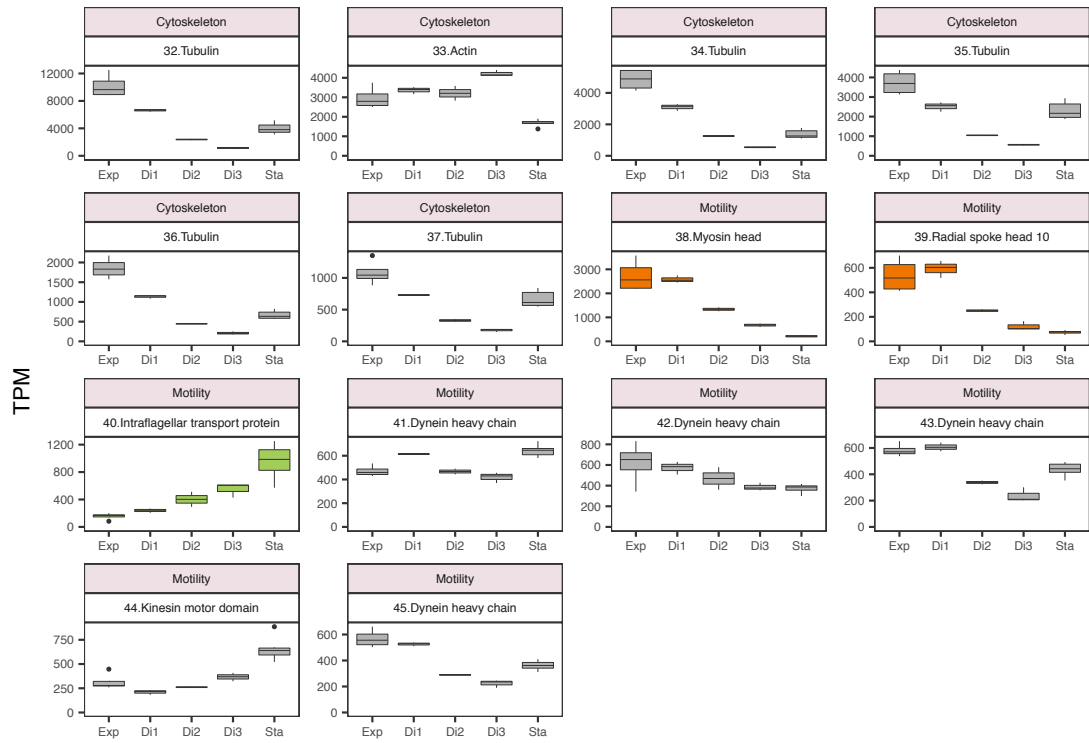

## Information processing

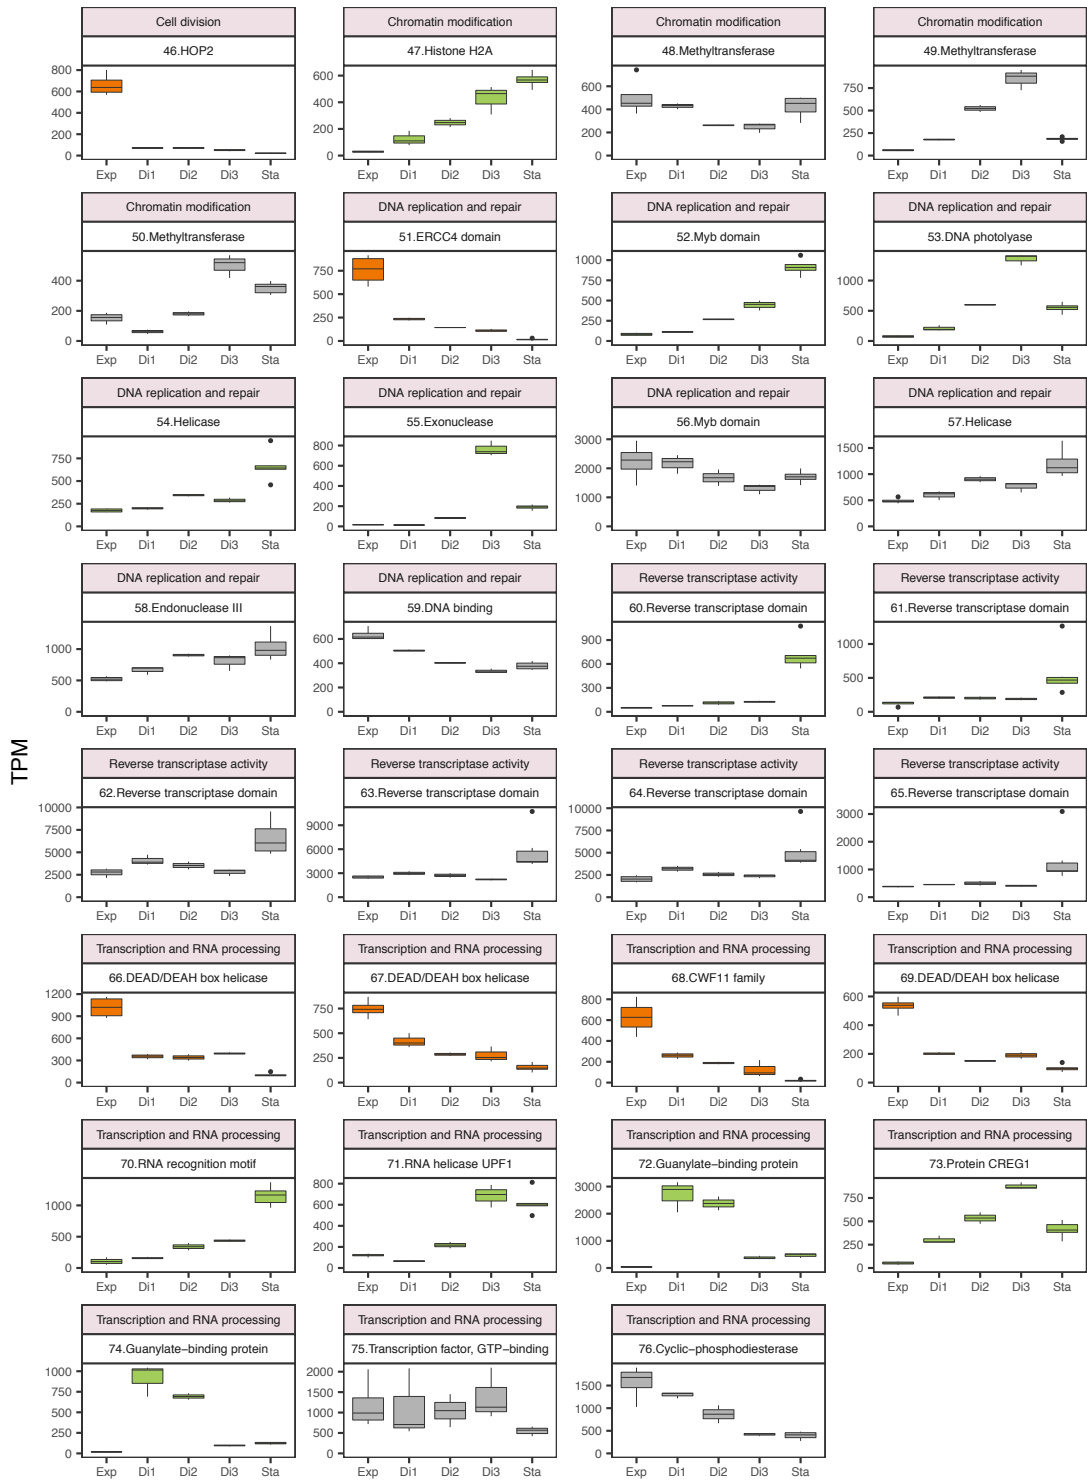



# Metabolism

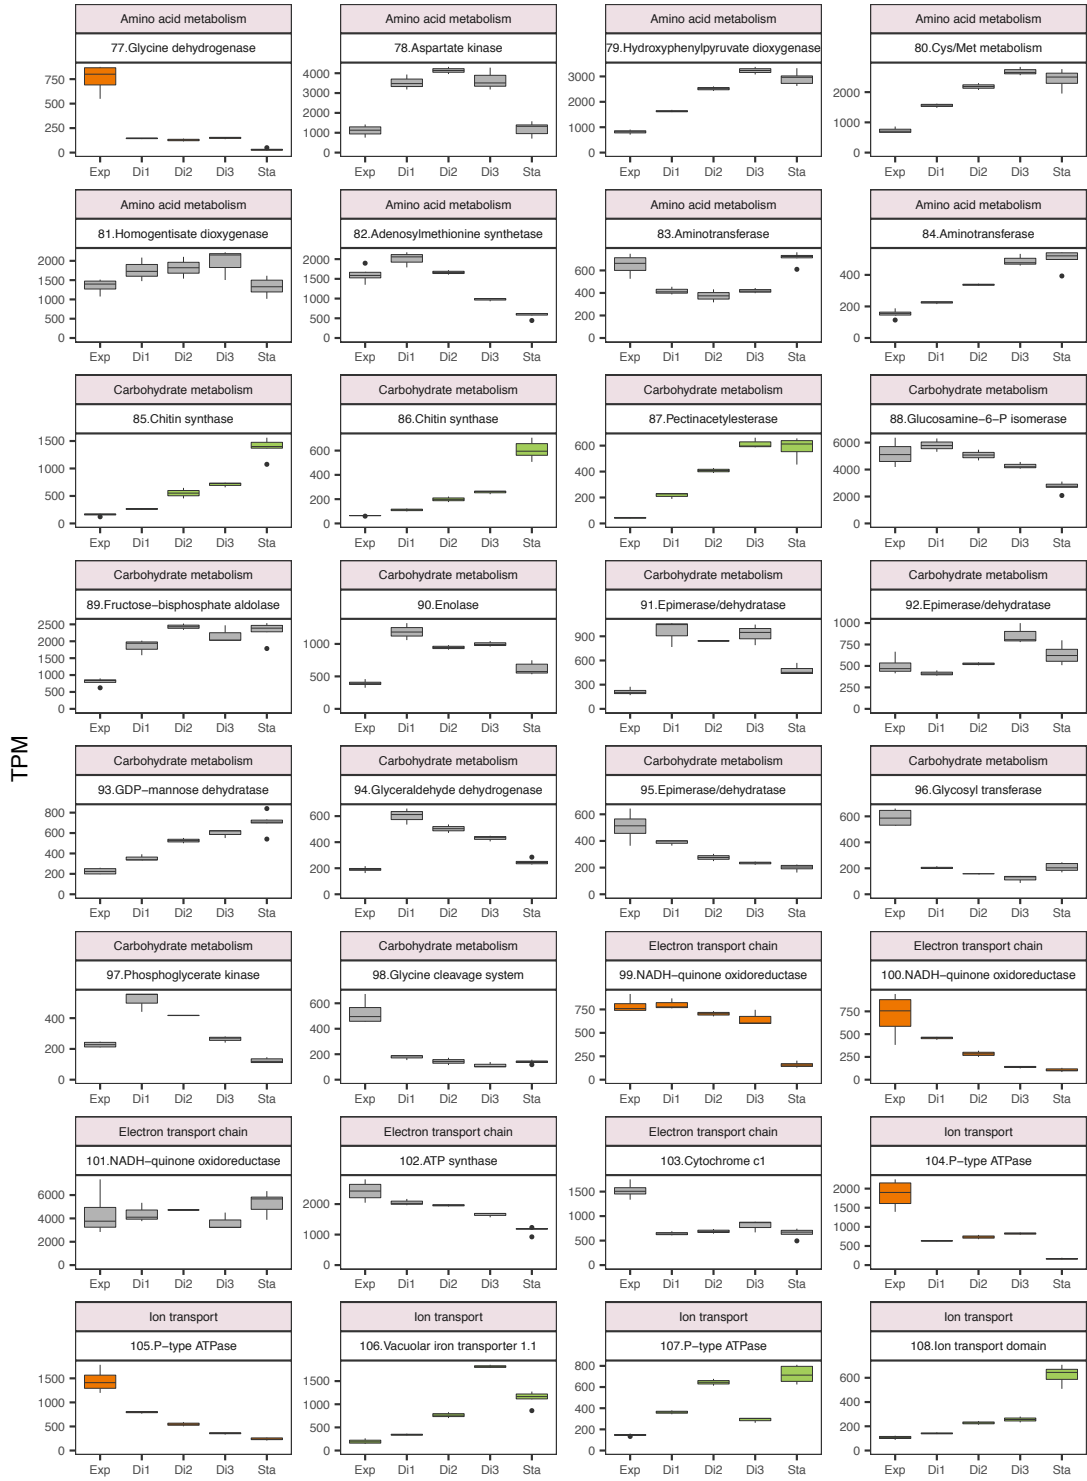

# Metabolism

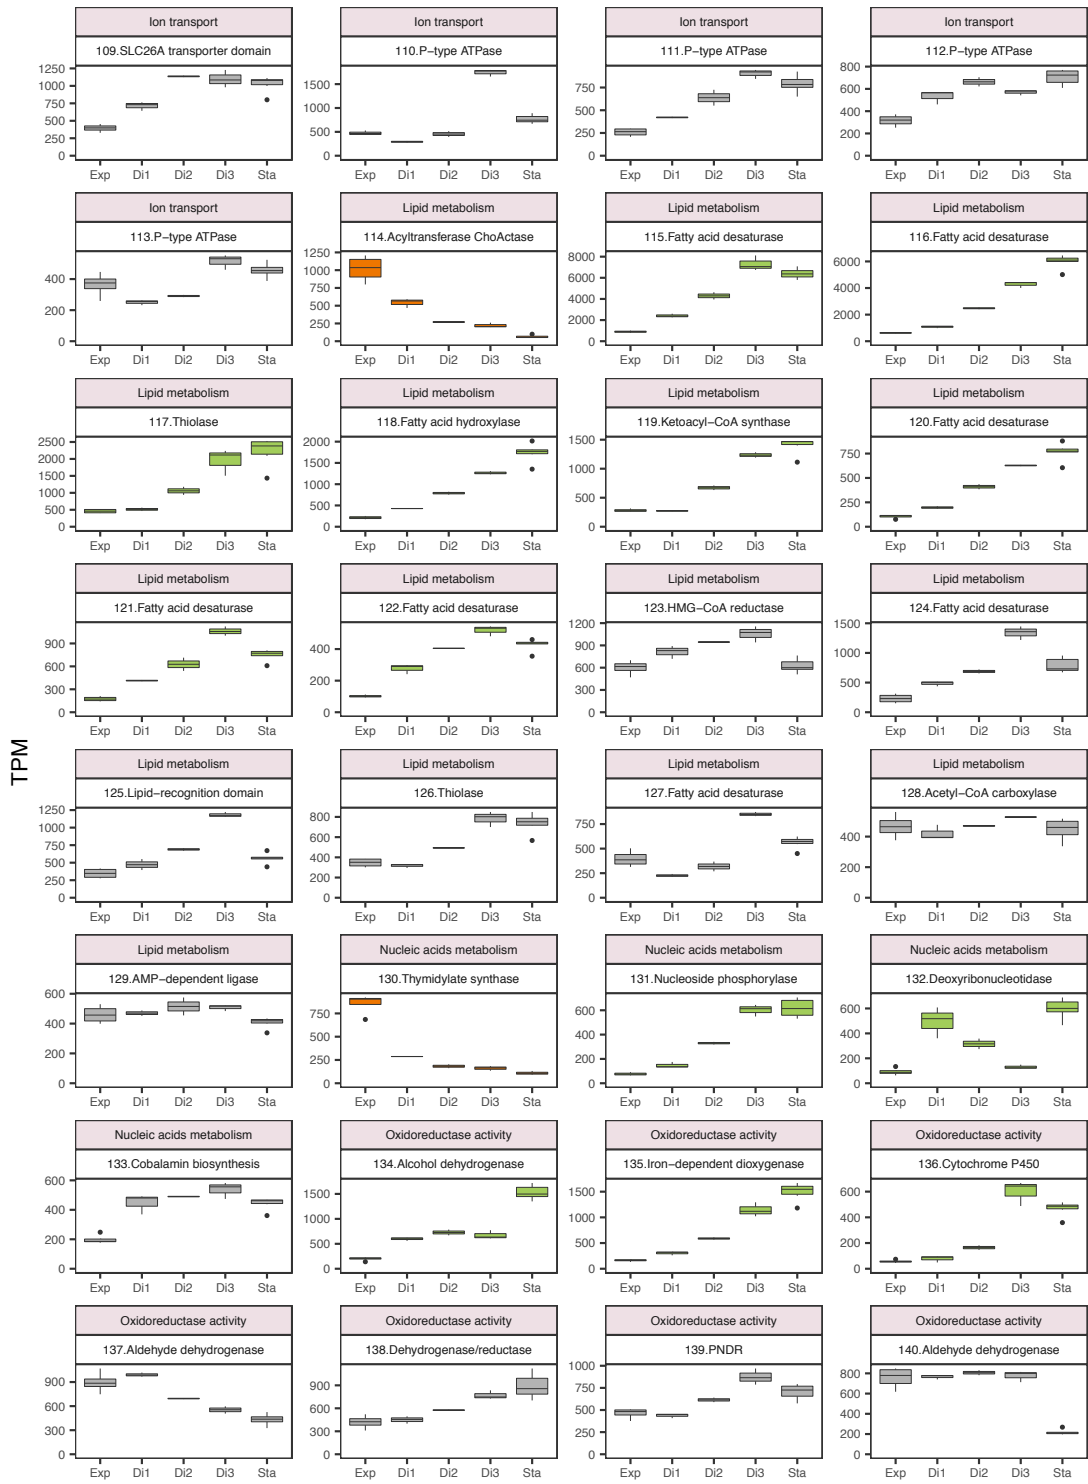

# Metabolism

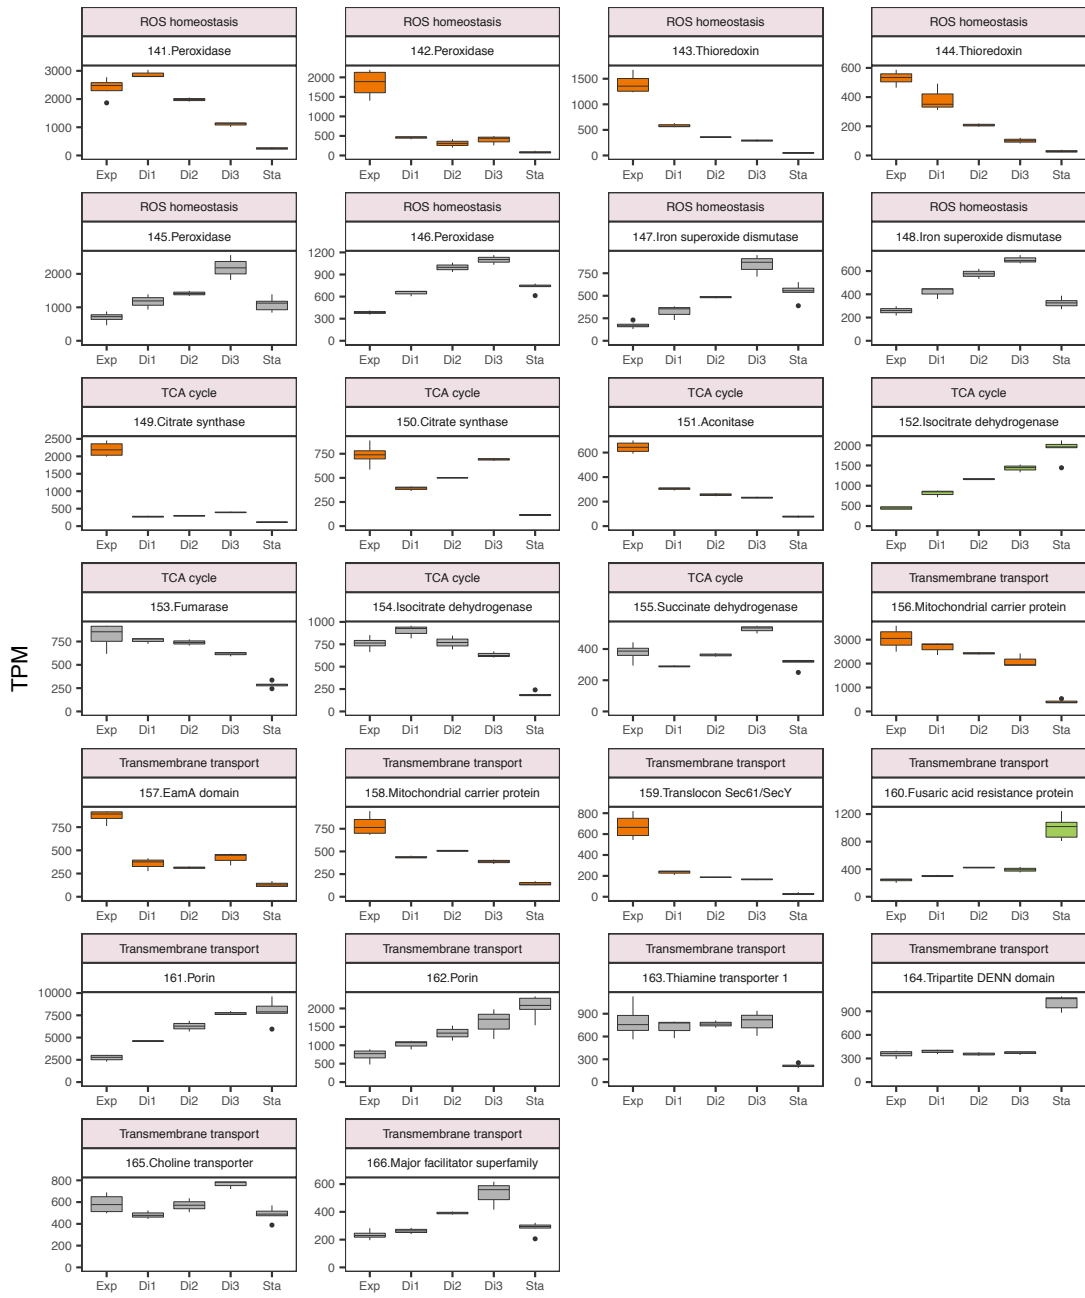

## Protein cellular processes

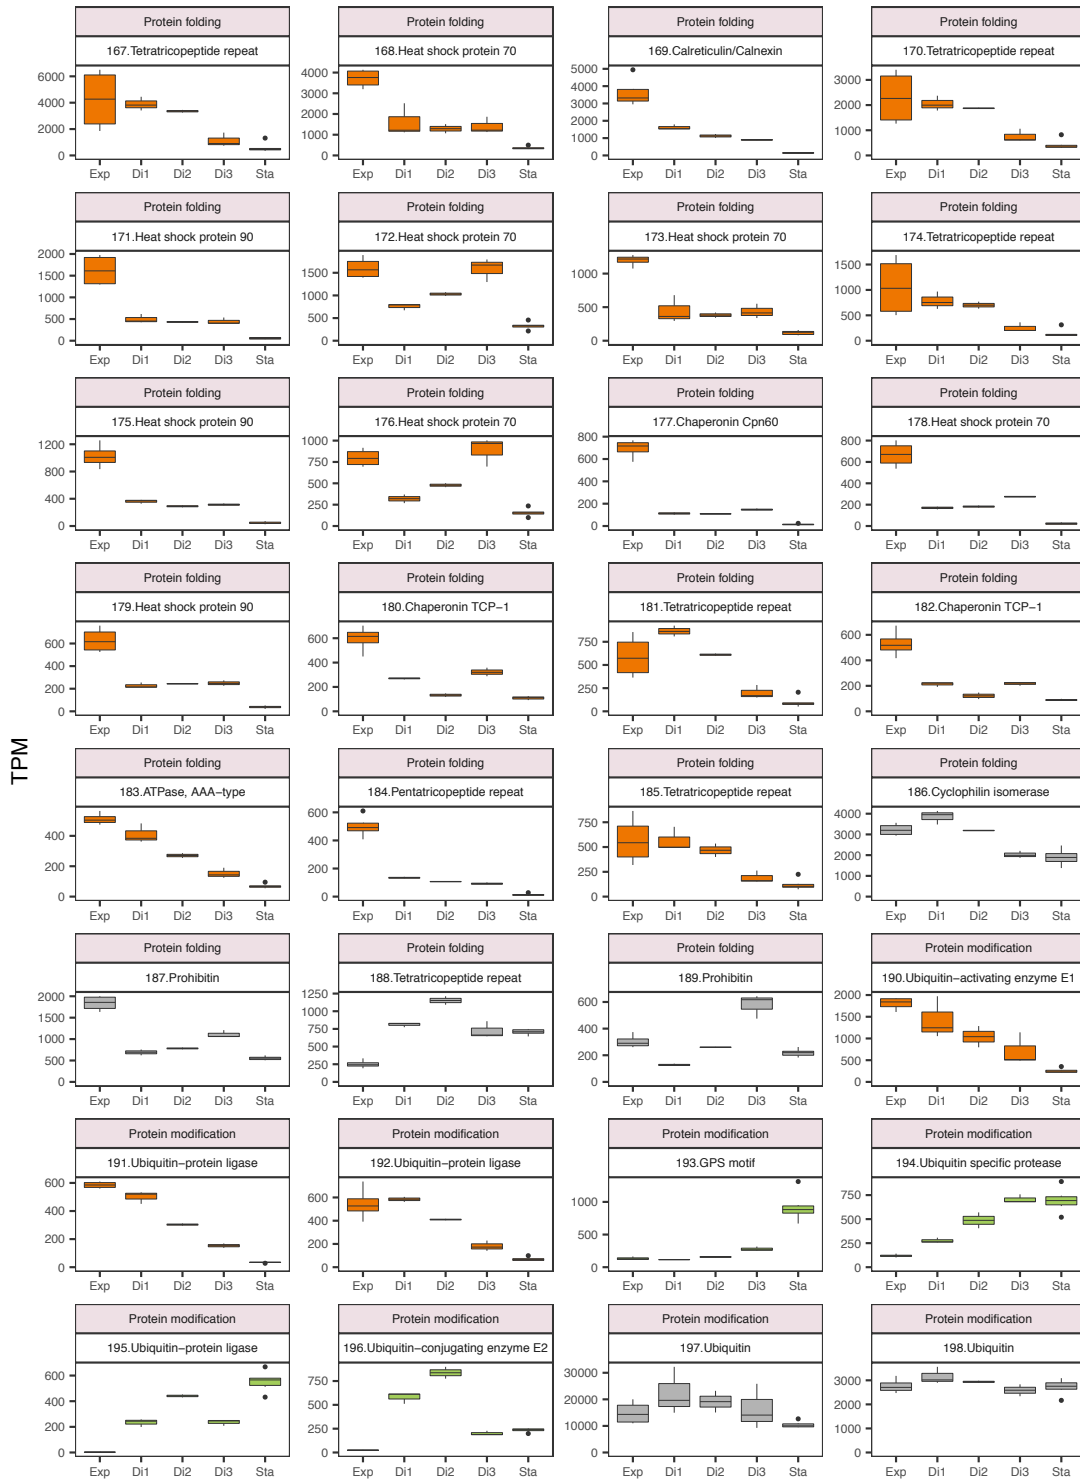

## Protein cellular processes

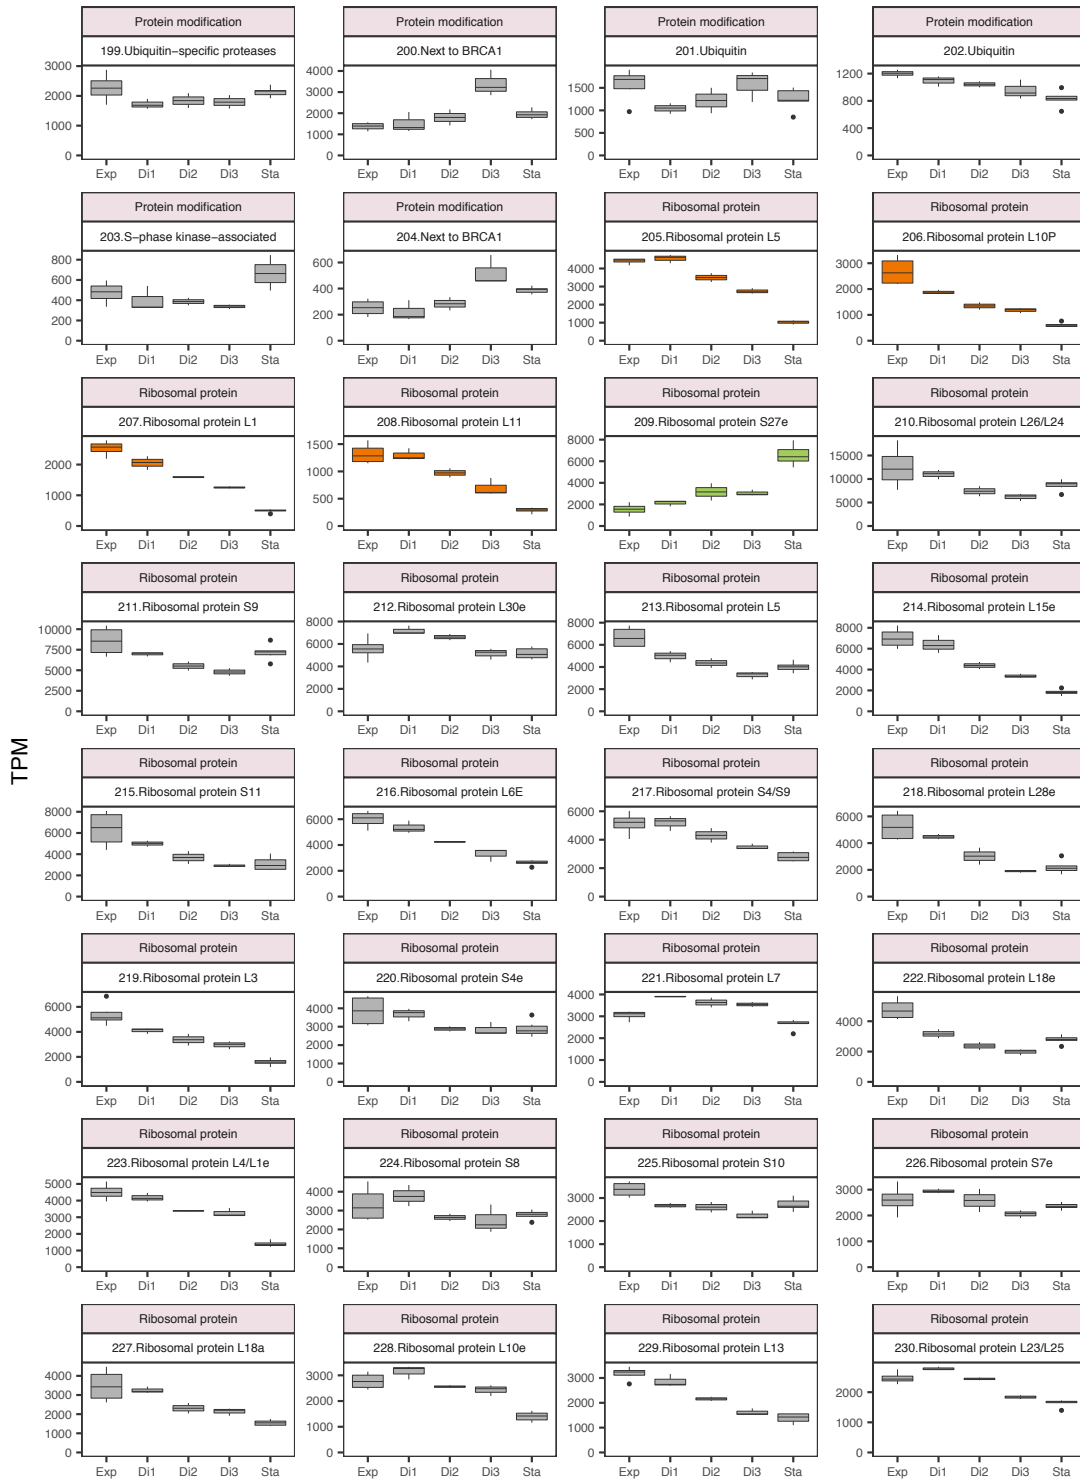

## Protein cellular processes

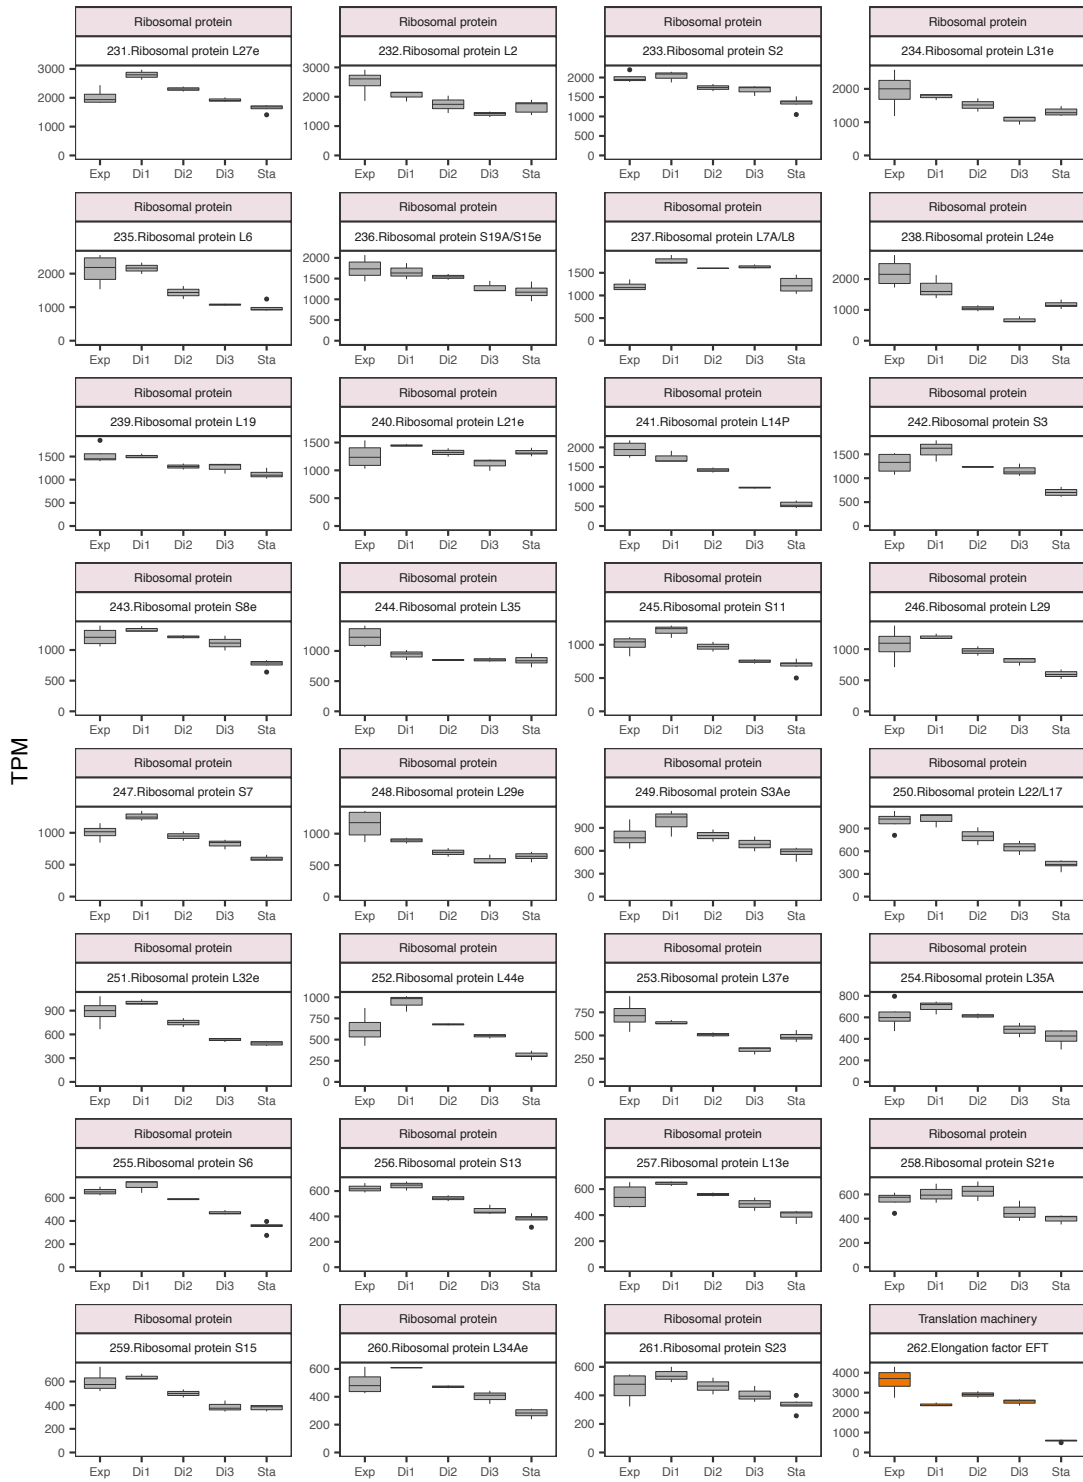

## Protein cellular processes

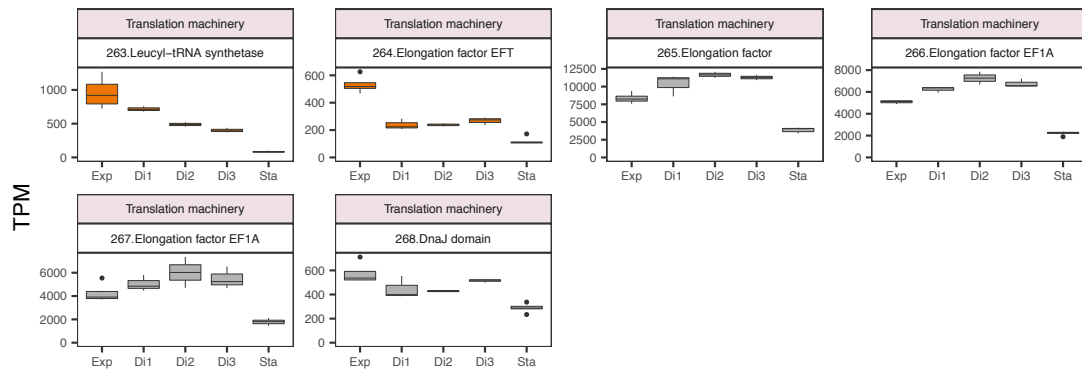

## Signaling and cell response

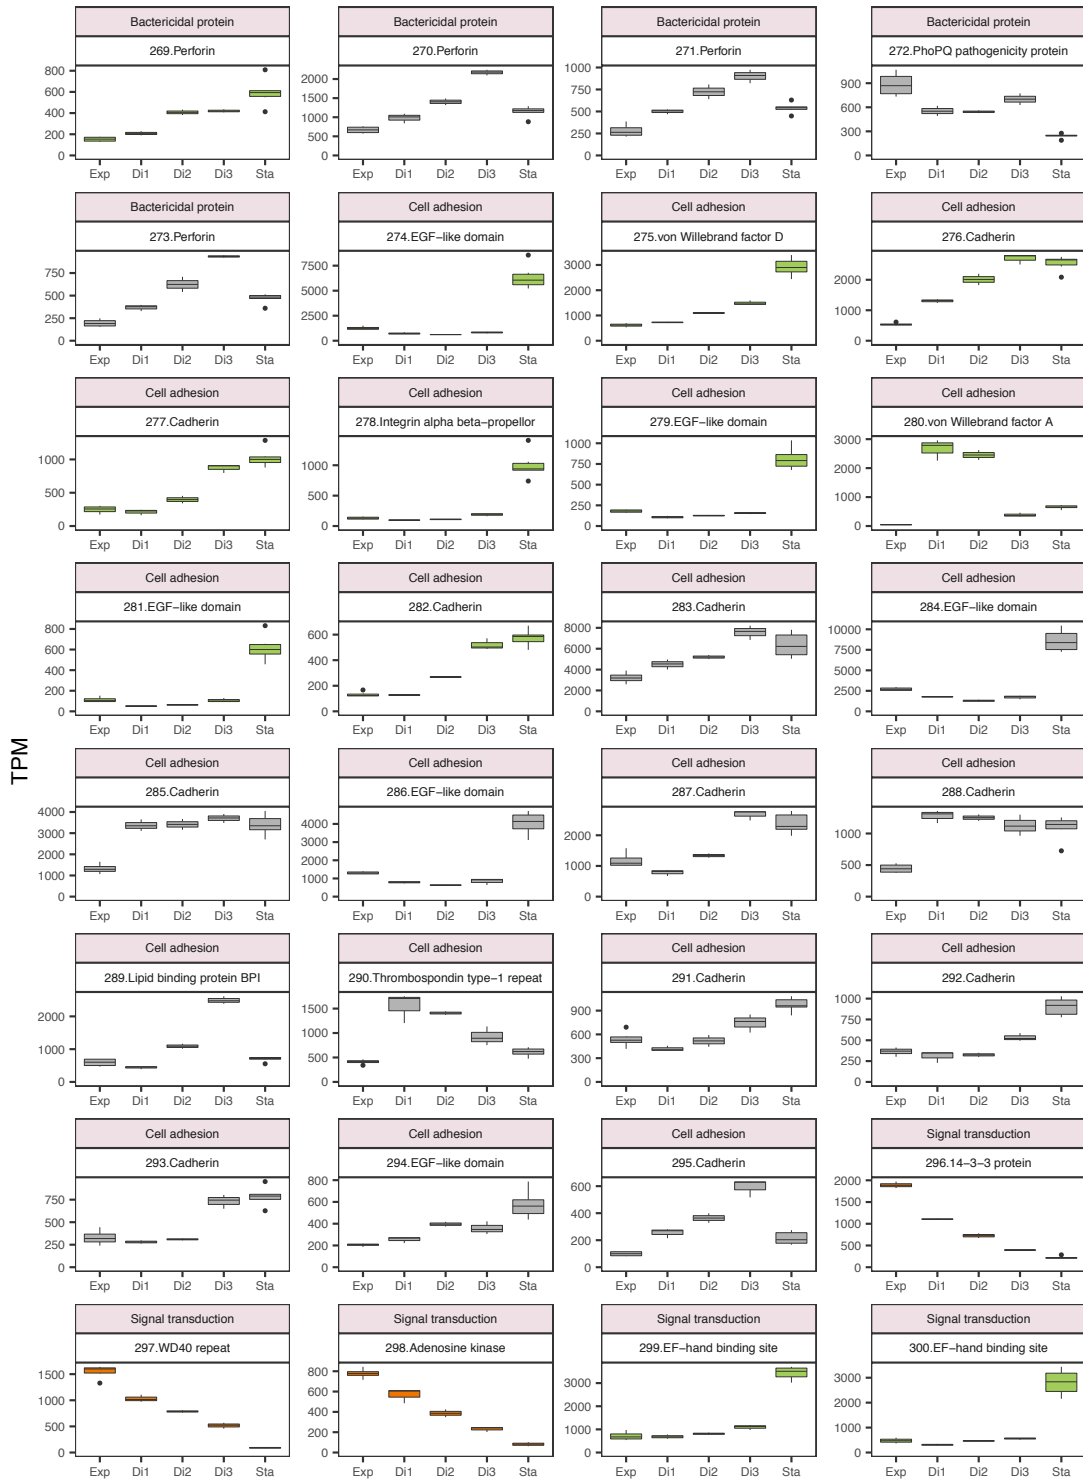



## Signaling and cell response

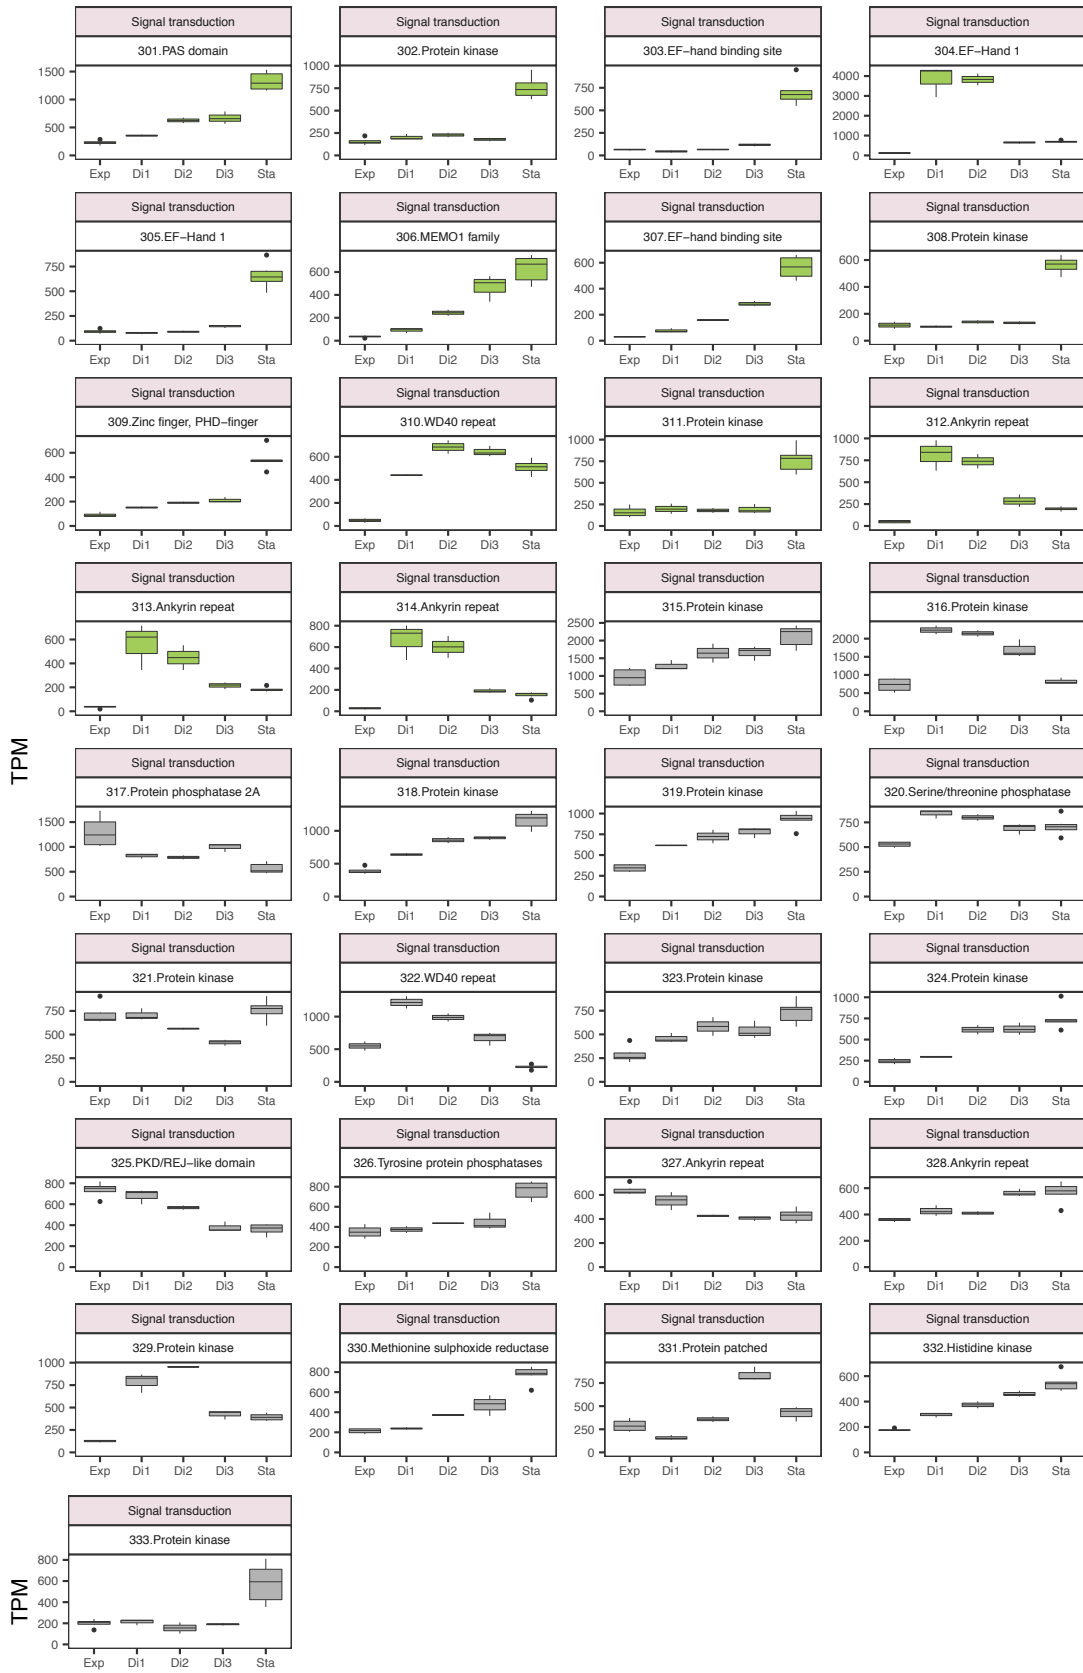

# Mitochondrial

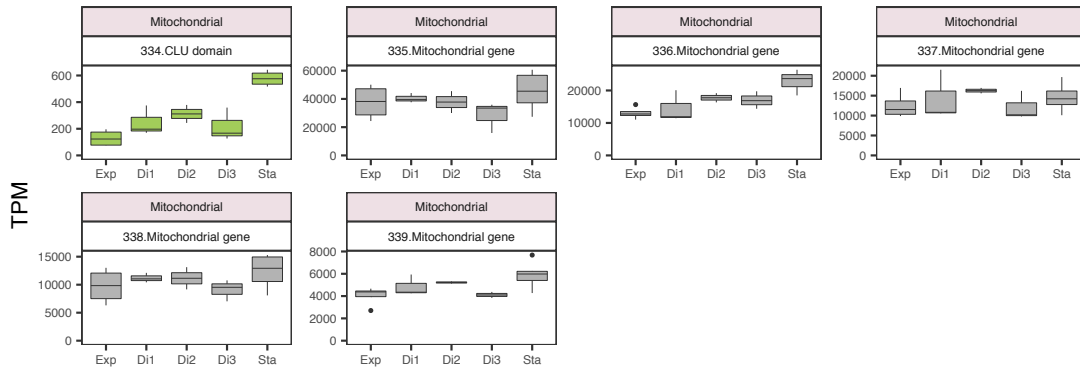

# Unknown

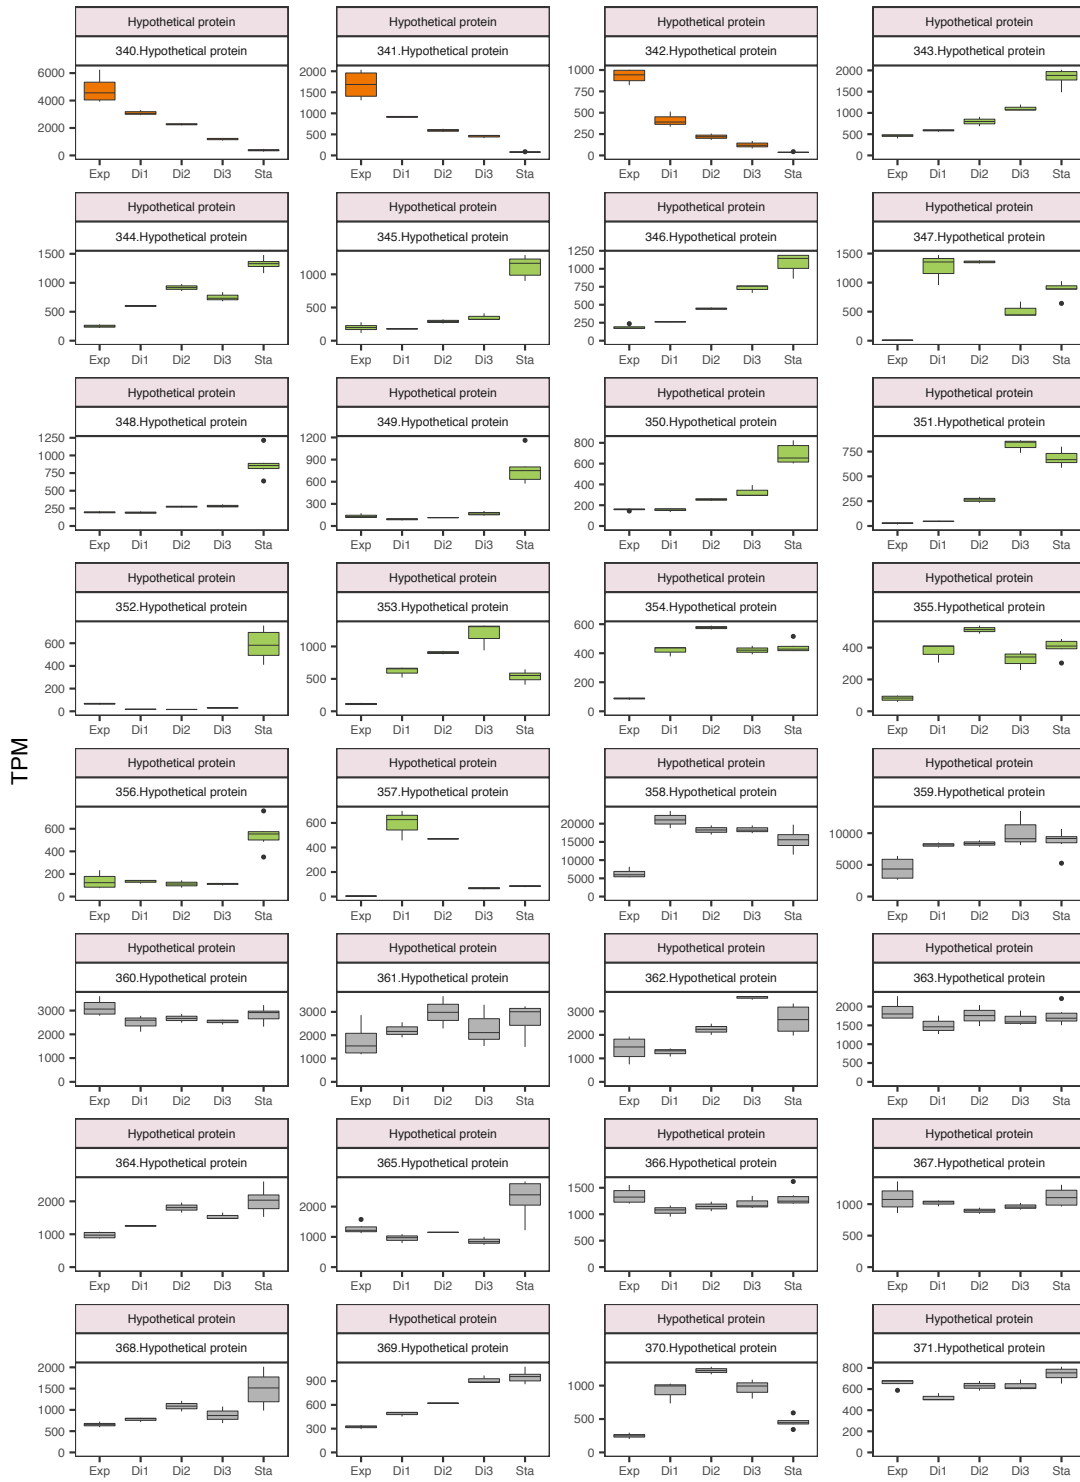

# Unknown

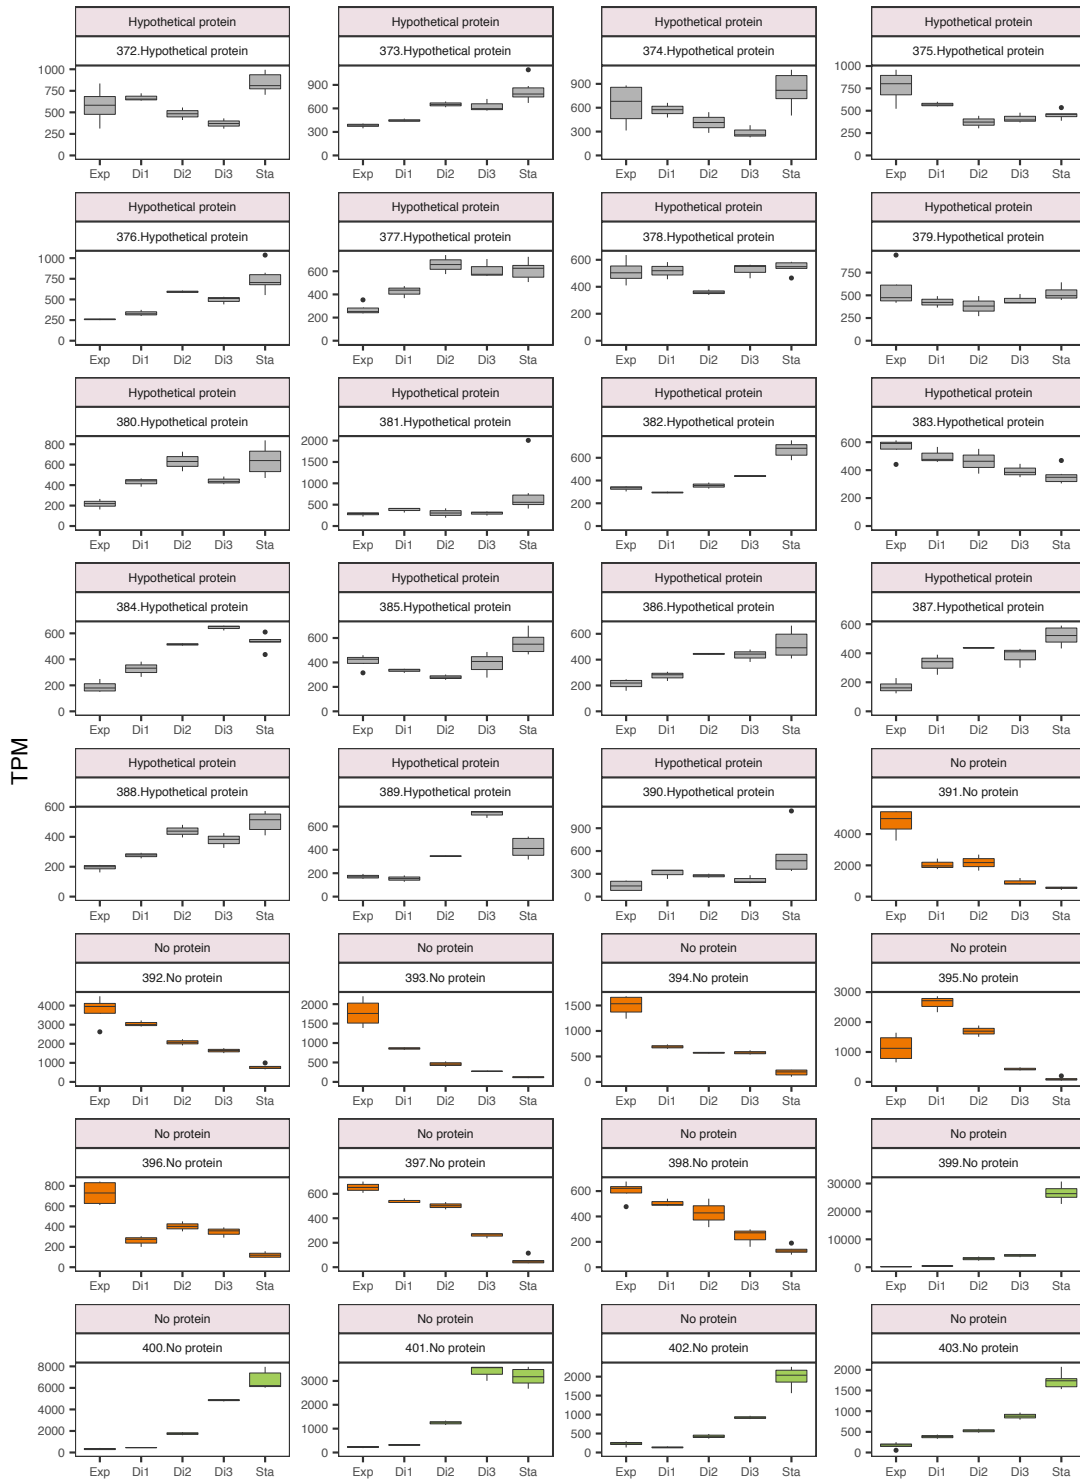

# Unknown

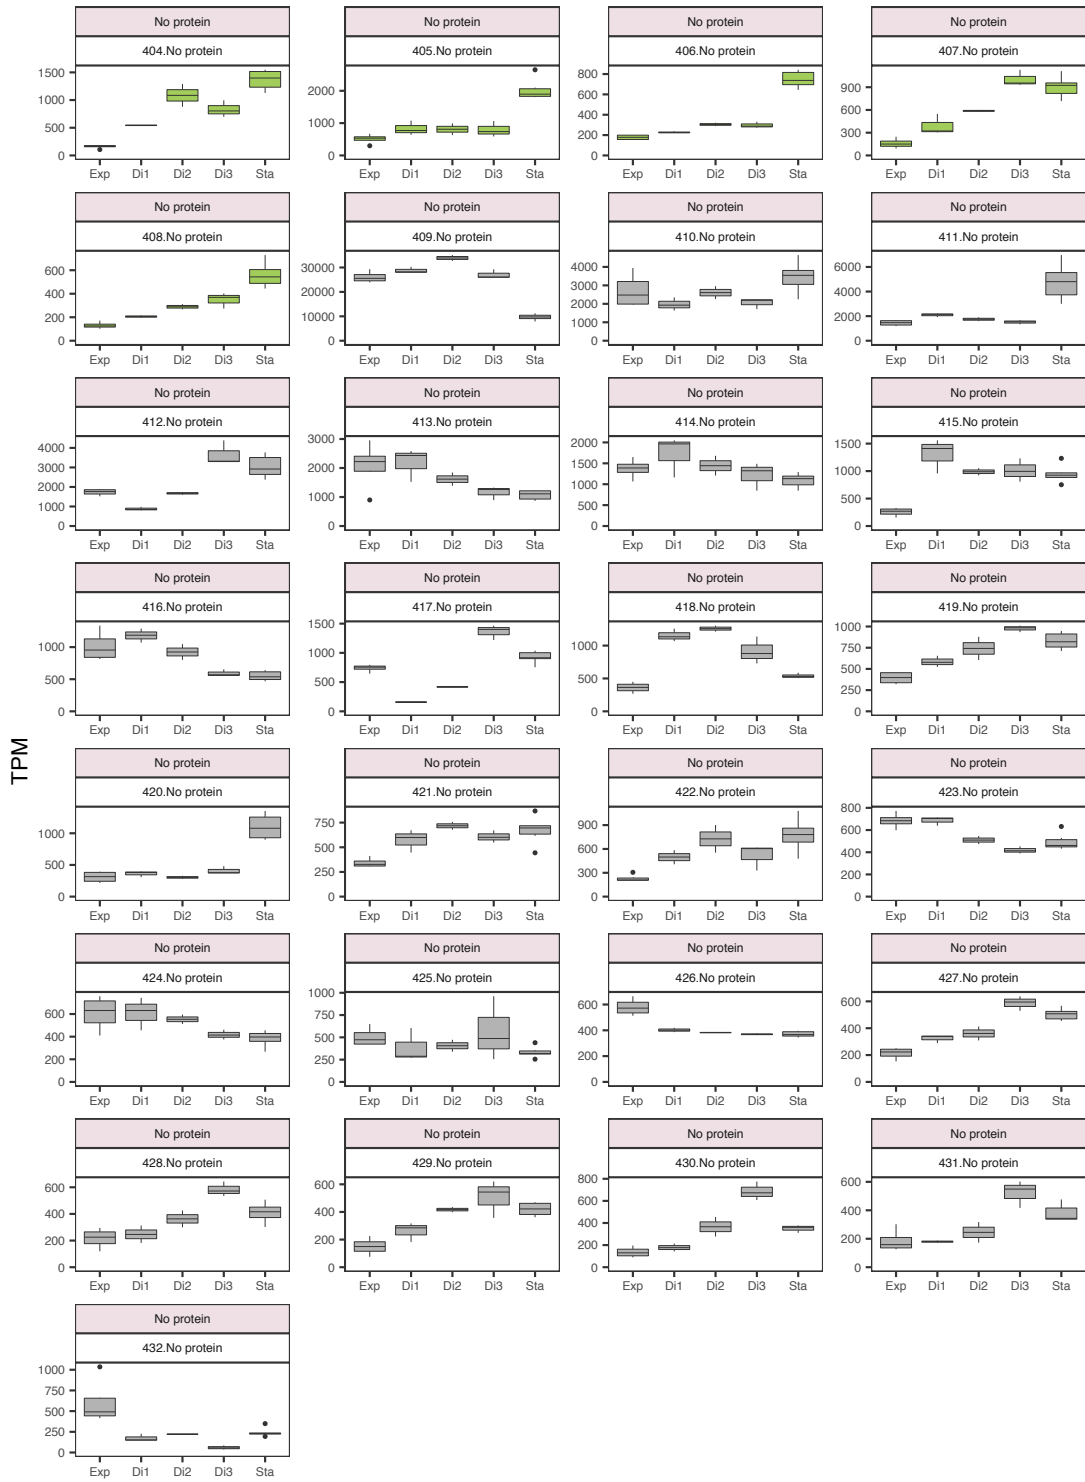

**Table S1** Naming of samples, indicating the phase, the biological and technical replicate, and number of reads at different steps: raw reads, reads removed (after quality control or because they affiliate with the bacterial genome or the rDNA operon), clean reads, and reads finally mapping to the *C. burkhardae de novo* transcriptome

| Name    | Phase       | Bottle | Replicate | Million reads (forward + reverse) |                           |                         |                       |             |              |
|---------|-------------|--------|-----------|-----------------------------------|---------------------------|-------------------------|-----------------------|-------------|--------------|
|         |             |        |           | Raw reads                         | Reads removed by Trimming | Reads removed by MED134 | Reads removed by rDNA | Clean reads | Mapped reads |
| Exp-B-a | Exponential | B      | a         | 16.4                              | 4.6                       | 4.8                     | 2.4                   | 4.6         | <b>3.5</b>   |
| Exp-B-b | Exponential | B      | b         | 15.1                              | 4.8                       | 3.9                     | 2.6                   | 3.8         | <b>2.9</b>   |
| Exp-C-a | Exponential | C      | a         | 9.7                               | 2.3                       | 3.5                     | 1.5                   | 2.4         | <b>1.5</b>   |
| Exp-C-b | Exponential | C      | b         | 15.9                              | 4.7                       | 5.0                     | 2.5                   | 3.7         | <b>2.7</b>   |
| Di1-A   | Dilution-1  | A      | -         | 11.5                              | 2.4                       | 1.9                     | 2.4                   | 4.8         | <b>3.5</b>   |
| Di1-B   | Dilution-1  | B      | -         | 19.6                              | 6.9                       | 2.2                     | 3.1                   | 7.2         | <b>5.3</b>   |
| Di1-C   | Dilution-1  | C      | -         | 12.9                              | 4.4                       | 1.5                     | 2.1                   | 5.0         | <b>3.6</b>   |
| Di2-A   | Dilution-2  | A      | -         | 18.1                              | 5.8                       | 1.7                     | 5.1                   | 5.5         | <b>3.7</b>   |
| Di2-B   | Dilution-2  | B      | -         | 15.3                              | 4.0                       | 1.5                     | 4.4                   | 5.4         | <b>3.6</b>   |
| Di3-A   | Dilution-3  | A      | -         | 14.3                              | 5.2                       | 0.9                     | 3.2                   | 4.9         | <b>3.0</b>   |
| Di3-B   | Dilution-3  | B      | -         | 11.4                              | 3.7                       | 1.0                     | 2.1                   | 4.6         | <b>3.3</b>   |
| Di3-C   | Dilution-3  | C      | -         | 11.3                              | 2.8                       | 0.8                     | 3.4                   | 4.3         | <b>3.2</b>   |
| Sta-A-a | Stationary  | A      | a         | 18.3                              | 5.7                       | 1.1                     | 5.6                   | 6.0         | <b>4.7</b>   |
| Sta-A-b | Stationary  | A      | b         | 16.1                              | 5.3                       | 0.8                     | 4.4                   | 5.7         | <b>4.6</b>   |
| Sta-B-a | Stationary  | B      | a         | 8.8                               | 2.1                       | 0.5                     | 2.7                   | 3.4         | <b>2.8</b>   |
| Sta-B-b | Stationary  | B      | b         | 14.2                              | 4.5                       | 0.7                     | 4.1                   | 5.0         | <b>3.9</b>   |
| Sta-C-a | Stationary  | C      | a         | 12.0                              | 3.9                       | 0.6                     | 3.0                   | 4.5         | <b>3.6</b>   |
| Sta-C-b | Stationary  | C      | b         | 21.5                              | 6.9                       | 1.0                     | 3.6                   | 9.9         | <b>8.0</b>   |
| Ino-a   | Inoculum    | -      | a         | 11.8                              | 3.9                       | 0.5                     | 3.4                   | 4.0         | <b>3.1</b>   |
| Ino-b   | Inoculum    | -      | b         | 15.7                              | 5.1                       | 0.5                     | 4.8                   | 5.3         | <b>4.1</b>   |
| Ino-c   | Inoculum    | -      | c         | 6.0                               | 2.5                       | 0.2                     | 1.5                   | 1.8         | <b>1.4</b>   |
| Average |             |        |           | 14.1                              | 4.4                       | 1.7                     | 3.2                   | 4.9         | <b>3.6</b>   |
| Max     |             |        |           | 21.5                              | 6.9                       | 5.0                     | 5.6                   | 9.9         | <b>8.0</b>   |
| Min     |             |        |           | 6.0                               | 2.1                       | 0.2                     | 1.5                   | 1.8         | <b>1.4</b>   |

**Table S2** Species used to build the stramenopile-oriented PLAZA genome database. For species marked by an asterisk, reference GO annotation was retrieved from the GO website.

| Species                                        | Source                        | Publication (Pubmed ID) |
|------------------------------------------------|-------------------------------|-------------------------|
| <i>Albugo candida</i>                          | NCBI                          | 21995639                |
| <i>Aplanochytrium kerguelense</i> PBS07        | JGI                           | /                       |
| <i>Arabidopsis thaliana</i> *                  | TAIR10                        | 11130711                |
| <i>Aurantiochytrium limacinum</i>              | JGI                           | /                       |
| <i>Aureococcus anophagefferens</i>             | JGI 1.0                       | 21368207                |
| <i>Bigelowiella natans</i>                     | JGI                           | 16760254                |
| <i>Blastocystis hominis</i>                    | NCBI                          | /                       |
| <i>Cafeteria burkhardae</i>                    | NCBI                          | 31978633                |
| <i>Chlamydomonas reinhardtii</i>               | JGI 5.5 (Phytozome 10.2)      | 17932292                |
| <i>Dictyostelium discoideum</i> *              | ENSEMBL protist release 28    | 15875012                |
| <i>Drosophila melanogaster</i> *               | ENSEMBL release 81            | 10731132                |
| <i>Ectocarpus siliculosus</i>                  | UGent ORCAE                   | 27870061                |
| <i>Hyphochytrium catenoides</i>                | NCBI                          | 29321239                |
| <i>MAST-1D</i>                                 | Co-assembly from single cells | /                       |
| <i>MAST-1I</i>                                 | Co-assembly from single cells | /                       |
| <i>MAST-3A</i>                                 | Co-assembly from single cells | /                       |
| <i>MAST-3F</i>                                 | Co-assembly from single cells | /                       |
| <i>MAST-4A</i>                                 | Co-assembly from single cells | /                       |
| <i>MAST-4C</i>                                 | Co-assembly from single cells | /                       |
| <i>MAST-4E</i>                                 | Co-assembly from single cells | /                       |
| <i>MAST-7</i>                                  | Co-assembly from single cells | /                       |
| <i>MAST-9</i>                                  | Co-assembly from single cells | /                       |
| <i>Nannochloropsis gaditana</i>                | ENSEMBL protist release 28    | 23966634                |
| <i>Phaeodactylum tricornutum</i>               | ENSEMBL protist release 28    | 18923393                |
| <i>Phytophthora sojae</i>                      | ENSEMBL protist release 28    | 16946065                |
| <i>Pseudo-nitzschia multiseriis</i>            | JGI 1.0                       | /                       |
| <i>Pythium ultimum</i>                         | NCBI                          | 20626842                |
| <i>Saccharomyces cerevisiae</i> strain S288C * | ENSEMBL release 81            | 8849441                 |
| <i>Saprolegnia parasitica</i>                  | NCBI                          | 23785293                |
| <i>Schizochytrium aggregatum</i> ATCC 28209    | JGI                           | /                       |
| <i>Schizosaccharomyces pombe</i> *             | ENSEMBL fungi release 28      | 11859360                |
| <i>Thalassiosira pseudonana</i>                | JGI                           | 15459382                |

**Table S3** Growth properties of *C. burkhardae* growing on *Dokdonia* MED134 in the three batch cultures established.

|                                                                   | <b>Bottle A</b> | <b>Bottle B</b> | <b>Bottle C</b> |
|-------------------------------------------------------------------|-----------------|-----------------|-----------------|
| Growth rate (h <sup>-1</sup> )                                    | 0.164           | 0.152           | 0.154           |
| Doubling time (h)                                                 | 4.2             | 4.6             | 4.5             |
| Maximal abundance (10 <sup>4</sup> cells ml <sup>-1</sup> )       | 7.5             | 8.6             | 8.1             |
| Grazing rate (bacteria flagellate <sup>-1</sup> h <sup>-1</sup> ) | 49.3            | 41.6            | 40.4            |
| Growth Efficiency (%)                                             | 35.9            | 39.5            | 41.1            |
| Decay rate in stationary (h <sup>-1</sup> )                       | 0.005           | 0.006           | 0.005           |
| Half-time decay in stationary (h)                                 | 140.4           | 120.7           | 129.5           |



**Table S4** Number of differentially expressed genes in pairwise comparisons among the five phases. Each line indicates the number of upregulated genes of the phase labeled per line (against the phase labeled per columns).

|                       |                    | <i>as compared with</i> |                   |                   |                   |                   |
|-----------------------|--------------------|-------------------------|-------------------|-------------------|-------------------|-------------------|
|                       |                    | <i>Exponential</i>      | <i>Dilution 1</i> | <i>Dilution 2</i> | <i>Dilution 3</i> | <i>Stationary</i> |
| <b>Upregulated in</b> | <b>Exponential</b> | -                       | 43                | 235               | 547               | 1231              |
|                       | <b>Dilution 1</b>  | 195                     | -                 | 34                | 366               | 785               |
|                       | <b>Dilution 2</b>  | 368                     | 34                | -                 | 50                | 289               |
|                       | <b>Dilution 3</b>  | 445                     | 118               | 18                | -                 | 224               |
|                       | <b>Stationary</b>  | 825                     | 419               | 182               | 245               | -                 |
